# Supplementary material for: DCPM-ADMET: Fusion of Dual-channel Pre-trained Model and Molecular Fingerprints to enhance Drug ADMET Properties Prediction
Source: Research Square preprint supplement (doi:10.21203/rs.3.rs-8326331/v1), 2025-12-19
Supplement: Supplementary file 1 [file c96f8acc45b08d1a84ca2065.xlsx]

## Sheet: calculated_props
SI calculated_props
Molecular Weight	`"MolWt"`
nHA	`"NumHAcceptors"`
nHD	`"NumHDonors"`
nRot	`"NumRotatableBonds"`
nRing	`"RingCount"`
MaxRing	`scopy.ScoDruglikeness.molproperty.GetProperties("MaxRing")`
nHet	`"NumHeteroatoms"`
Volumn	`scopy.ScoDruglikeness.molproperty.GetProperties("Vol")`
Dense	`scopy.ScoDruglikeness.molproperty.GetProperties("Dense")`
fChar	`scopy.ScoDruglikeness.molproperty.GetProperties("fChar")`
nRig	`scopy.ScoDruglikeness.molproperty.GetProperties("nRig")`
Flexibility	`scopy.ScoDruglikeness.molproperty.GetProperties("Flex")`
Stereo Centers	`Chem.CalcNumAtomStereoCenters()`
TPSA	`"TPSA"`
LogP	`"MolLogP"`
QED	`"qed"`
SAscore	`sascorer.calculateScore`
Fsp3	`"FractionCSP3"`
MCE-18	kotori-y/MCE-18
Lipinski Rule	`scopy.ScoDruglikeness.rulesfilter.scopy.ScoDruglikeness.rulesfilter.CheckGSKRule()()`
Pfizer Rule	`scopy.ScoDruglikeness.rulesfilter.CheckPfizerRule()`
GSK Rule	`scopy.ScoDruglikeness.rulesfilter.CheckGSKRule()`
PAINS	`scopy.scopy.ScoFH.fh_filter.Check_PAINS()`
BMS Rule	`scopy.scopy.ScoFH.fh_filter.Check_BMS()`
ALARM NMR Rule	`scopy.scopy.ScoFH.fh_filter.Check_Alarm_NMR()`
Golden Triangle	`scopy.ScoDruglikeness.rulesfilter.CheckGoldenTriangle()`
AvgIpc	`"AvgIpc"`
BalabanJ	BalabanJ
BertzCT	BertzCT
HallKierAlpha	HallKierAlpha
Ipc	Ipc
LabuteASA	LabuteASA
HeavyAtomCount	`"HeavyAtomCount"`
NHOHCount	`"NHOHCount"`
NOCount	`"NOCount"`
NumAliphaticRings	`"NumAliphaticRings"`

## Sheet: ADMET_cla
SI ADMET_cla
data_name	max_auc_fp	max_auc_dcpm	mean_auc_fp	mean_auc_dcpm	num_compounds
A_Bioavailability	0.761	0.877	0.657	0.738	640
A_Caco-2_Permeability	0.893	0.899	0.863	0.839	1739
A_HIA	1	1	0.983	0.986	863
A_HOB	0.733	0.764	0.686	0.729	1474
A_MDCK_Permeability	0.9	0.928	0.604	0.759	486
A_PAMPA	0.798	0.797	0.741	0.731	2034
A_Pgp_Inhibitor	0.96	0.947	0.934	0.936	1216
A_Pgp_Substrate	0.911	0.922	0.873	0.883	1087
D_BBB	0.96	0.957	0.941	0.951	3078
HLM	0.813	0.834	0.799	0.807	6013
M_BCRP_Inhibitor	0.967	0.942	0.955	0.937	3903
M_CYP450_1A2_Inhibitor	0.865	0.873	0.858	0.869	14502
M_CYP450_2C19_Inhibitor	0.821	0.845	0.81	0.842	14614
M_CYP450_2C9_Inhibitor	0.817	0.87	0.803	0.848	13975
M_CYP450_2C9_Substrate	0.896	0.865	0.867	0.817	953
M_CYP450_2D6_Inhibitor	0.809	0.825	0.798	0.812	15121
M_CYP450_2D6_Substrate	0.805	0.801	0.749	0.729	663
M_CYP450_3A4_Inhibitor	0.837	0.841	0.824	0.83	14203
M_CYP450_3A4_Substrate	0.913	0.84	0.85	0.788	953
M_OATP1B1_Inhibitor	0.873	0.901	0.827	0.865	1340
M_OATP1B3_Inhibitor	0.87	0.942	0.795	0.862	1250
M_OCT2_Inhibitor	0.839	0.824	0.778	0.791	904
Micronucleus	0.946	0.951	0.873	0.925	641
Nephrotoxicity	0.774	0.855	0.736	0.791	830
PIH	0.737	0.775	0.71	0.685	1402
PIV	0.769	0.825	0.712	0.727	446
RLM	0.834	0.826	0.813	0.808	5590
T_Ames_Toxicity	0.844	0.867	0.83	0.854	7858
T_Biodegradation	0.912	0.929	0.896	0.892	1048
T_Carcinogencity	0.805	0.804	0.762	0.756	1366
T_ClinTox	0.917	0.86	0.791	0.807	1440
T_DILI	0.914	0.865	0.88	0.819	2051
T_Eye_Corrosion	0.977	0.985	0.959	0.977	2294
T_Eye_Irritation	0.924	0.943	0.914	0.933	6309
T_FDAMDD	0.926	0.888	0.879	0.848	801
T_Fish_Toxicity	0.869	0.957	0.838	0.917	554
T_Genotoxicity	0.888	0.934	0.855	0.908	638
T_H-HT	0.707	0.768	0.68	0.706	2156
T_Honey_Bee_Toxicity	0.855	0.802	0.769	0.673	192
T_NR-AR	0.892	0.916	0.857	0.868	7414
T_NR-AR-LBD	0.902	0.92	0.835	0.846	6758
T_NR-AhR	0.874	0.91	0.856	0.889	6667
T_NR-Aromatase	0.843	0.899	0.797	0.844	5821
T_NR-ER	0.829	0.864	0.728	0.791	6193
T_NR-ER-LBD	0.78	0.915	0.764	0.875	7079
T_NR-PPAR-gamma	0.853	0.875	0.751	0.794	6588
T_Respiratory_Toxicity	0.836	0.888	0.817	0.863	1399
T_SR-ARE	0.807	0.841	0.774	0.822	5906
T_SR-ATAD5	0.828	0.861	0.766	0.796	7227
T_SR-HSE	0.77	0.795	0.733	0.763	6571
T_SR-MMP	0.876	0.917	0.849	0.902	5902
T_SR-p53	0.845	0.858	0.822	0.818	6906
T_Skin_Sensitization	0.85	0.834	0.748	0.778	540
T_hERG_Inhibition	0.906	0.898	0.884	0.876	9168
average	0.857963	0.876278	0.812463	0.831481

## Sheet: ADMET_reg
SI ADMET_reg
data_name	max_pcc_fp	max_pcc_dcpm	mean_pcc_fp	mean_pcc_dcpm	mean_rmse_fp	mean_rmse_dcpm	min_rmse_fp	min_rmse_dcpm	num_compounds
T_Rat_Skin_LD50	0.6	0.567	0.468	0.505	0.706	0.694	0.613	0.595	835
A_Bioavailability	0.525	0.543	0.482	0.509	30.962	29.928	29.933	27.421	982
T_Mammal_Intraperitoneal_LD50	0.784	0.597	0.592	0.517	0.495	0.516	0.406	0.456	545
T_Mouse_Parenteral_LD50	0.739	0.698	0.677	0.519	0.571	0.639	0.484	0.424	302
T_Mammal_Oral_LD50	0.793	0.633	0.595	0.52	0.689	0.732	0.513	0.613	674
D_VD	0.9	0.777	0.599	0.543	23.505	24.686	4.574	5.34	1525
M_CYP450_3A4_Inhibition	0.636	0.568	0.607	0.546	0.868	0.905	0.855	0.893	27857
T_Mouse_Oral_LD50	0.504	0.576	0.495	0.549	0.543	0.523	0.538	0.521	23373
T_Rat_Intraperitoneal_LD50	0.625	0.611	0.572	0.55	0.705	0.717	0.663	0.694	5021
T_Rat_Subcutaneous_LDLo	0.802	0.949	0.598	0.568	0.976	0.924	0.83	0.674	174
T_Man_Oral_TDLo	0.615	0.649	0.384	0.575	1.068	0.945	0.758	0.77	163
T_Mouse_Intramuscular_LD50	0.755	0.701	0.615	0.575	0.728	0.761	0.656	0.687	571
T_Rat_Intravenous_LDLo	0.599	0.708	0.448	0.597	0.943	0.878	0.641	0.56	135
T_Rat_Subcutaneous_LD50	0.602	0.654	0.549	0.598	0.87	0.827	0.775	0.723	1896
M_CYP450_1A2_Inhibition	0.581	0.616	0.564	0.599	0.606	0.586	0.57	0.559	18971
T_BZR_Inhibition	0.808	0.732	0.715	0.614	0.755	0.847	0.631	0.73	332
T_Mouse_Subcutaneous_LD50	0.732	0.699	0.664	0.624	0.654	0.686	0.638	0.664	6769
T_Mammal_Subcutaneous_LD50	0.867	0.91	0.613	0.643	0.403	0.383	0.24	0.212	125
T_Human_Oral_TDLo	0.815	0.825	0.688	0.662	1.16	1.258	0.842	1.033	140
T_Rat_Oral_LD50	0.647	0.691	0.614	0.664	0.72	0.69	0.685	0.653	10190
D_PPB	0.719	0.752	0.691	0.669	19.24	19.875	18.709	17.561	3637
T_Cox-2_Inhibition	0.754	0.759	0.678	0.672	0.795	0.808	0.69	0.663	412
T_Mouse_Intravenous_LD50	0.574	0.711	0.563	0.698	0.617	0.535	0.605	0.516	16978
T_Rat_Intravenous_LD50	0.711	0.739	0.687	0.706	0.742	0.709	0.711	0.672	2472
T_Acute_Oral_Toxicity	0.745	0.748	0.698	0.712	0.682	0.67	0.657	0.647	6793
T_LD50	0.681	0.746	0.658	0.721	0.732	0.677	0.699	0.638	7338
T_ER_Inhibition	0.91	0.804	0.823	0.738	0.706	0.852	0.515	0.705	316
A_Pgp_Inhibition	0.857	0.809	0.818	0.759	0.603	0.67	0.551	0.625	1562
T_LogHD50	0.82	0.809	0.778	0.772	0.522	0.515	0.485	0.476	635
T_LC50FM	0.715	0.837	0.637	0.778	1.172	0.952	1.084	0.873	842
A_Caco-2_Permeability	0.794	0.841	0.765	0.797	0.504	0.457	0.426	0.435	925
T_LC50DM	0.771	0.886	0.689	0.834	1.104	0.847	0.912	0.732	968
T_LogBCF	0.793	0.863	0.726	0.838	0.977	0.777	0.92	0.697	1511
T_IGC50	0.793	0.866	0.717	0.84	0.742	0.583	0.697	0.513	1793
T_Tetrahymena_pyriformis_Toxicity	0.807	0.865	0.761	0.846	0.671	0.554	0.61	0.492	1087
Z_LogD	0.687	0.866	0.662	0.857	1.773	1.206	1.721	1.178	53984
Neurotoxicity	0.919	0.937	0.805	0.883	0.296	0.242	0.2	0.177	421
Z_MP	0.812	0.892	0.796	0.887	59.626	45.276	56.252	43.729	8648
Z_LogP	0.75	0.912	0.742	0.907	1.256	0.789	1.214	0.755	17352
Z_Solubility	0.836	0.941	0.78	0.927	1.247	0.756	1.163	0.715	1663
Z_Hydration_Free_Energy	0.9	0.953	0.757	0.929	2.437	1.441	1.72	1.222	642
Z_LogVP	0.872	0.964	0.837	0.956	2.011	1.064	1.882	0.983	2713
Z_BP	0.84	0.963	0.825	0.959	46.471	23.643	45.222	21.498	5432
average	0.74393	0.771326	0.661209	0.701442	4.95007	4.00053	4.26721	3.27265

## Sheet: withdrawn drugs
SI withdrawn drugs
1	name	SMILES	description	prop	pred	mean similarity	max similarity
41	Strontium ranelate	[Sr++].[Sr++].[O-]C(=O)CN(CC([O-])=O)C1=C(C#N)C(CC([O-])=O)=C(S1)C([O-])=O	Strontium ranelate, a strontium (II) salt of ranelic acid, is a medication for osteoporosis. Some reports have shown that strontium ranelate can slow down the progression of osteoarthritis of the knee. This agent presents an atypical mechanism of action in which it increases deposition of new bone by osteoblasts and, simultaneously, reduces the resorption of bone by osteoclasts. It is therefore p…	hERG	0	0.062	0.206
30	Flosequinan	CN1C=C(C(=O)C2=C1C=C(F)C=C2)S(C)=O	Flosequinan was approved in the USA and the UK for a year prior to being withdrawn from the market due to increased mortality in chronic heart failure patients, found in drug trials.[A174979,L43942]	hERG	1	0.105	0.263
18	Tolrestat	COC1=C(C2=CC=CC(C(=S)N(C)CC(O)=O)=C2C=C1)C(F)(F)F	Tolrestat (INN) (AY-27773) is an aldose reductase inhibitor which was approved for the control of certain diabetic complications. While it was approved for marketed in several countries, it failed a Phase III trial in the U.S. due to toxicity and never received FDA approval. It was sold under the tradename Alredase but was discontinued by Wyeth in 1997 because of the risk of severe liver toxicity…	Hepatotoxicity	1	0.121	0.276
5	Thalidomide	O=C1N(C2CCC(=O)NC2=O)C(=O)C2=CC=CC=C12	A piperidinyl isoindole originally introduced as a non-barbiturate hypnotic, thalidomide was withdrawn from the market due to teratogenic effects. It has been reintroduced and used for a number of inflammatory disorders and cancers. Thalidomide displays immunosuppressive and anti-angiogenic activity through modulating the release of inflammatory mediators like tumor necrosis factor-alpha (TNF-a) …	Genotoxicity	1	0.071	0.281
15	Sitaxentan	CC1=NOC(NS(=O)(=O)C2=C(SC=C2)C(=O)CC2=CC3=C(OCO3)C=C2C)=C1Cl	Sitaxentan was marketed under the trade name Thelin for the treatment of pulmonary arterial hypertension (PAH) by Encysive Pharmaceuticals until Pfizer purchased Encysive in February 2008. In 2010, Pfizer voluntarily removed sitaxentan from the market over concerns of hepatotoxicity.	Hepatotoxicity	1	0.106	0.294
8	Etifoxine	CCNC1=NC2=CC=C(Cl)C=C2C(C)(O1)C1=CC=CC=C1	Etifoxine is an anxiolytic and anticonvulsant drug developed by Hoechst in the 1960s. It is used in anxiety disorders and to promote peripheral nerve healing. It does not bind to the benzodiazepine receptor though the effects are similar to that of benzodiazepines. It is more effective than lorazepam as an anxiolytic, and has fewer side effects. Etifoxine has been associated with acute liver inju…	Hepatotoxicity	1	0.107	0.306
34	Lorcaserin	C[C@H]1CNCCC2=CC=C(Cl)C=C12	Lorcaserin (previously APD-356), a highly selective 5HT2C receptor agonist, is used for the treatment of obesity. It has been shown to reduce body weight and food intake in animal models of obesity, and it is thought that targeting the 5HT2C receptor may alter body weight by regulating satiety. Lorcaserin is marketed as a salt form called Belviq, which is lorcaserin hydrochloride.In February 2020…	hERG	1	0.105	0.315
24	Carbocromen	CCOC(=O)COC1=CC2=C(C=C1)C(C)=C(CCN(CC)CC)C(=O)O2	Carbocromen was marketed for use in Germany as a vasodilator, however, it has been discontinued due to the risk of arrhythmia development [L5635].	hERG	1	0.122	0.317
45	Valdecoxib	CC1=C(C(=NO1)C1=CC=CC=C1)C1=CC=C(C=C1)S(N)(=O)=O	Valdecoxib was removed from the Canadian, U.S., and E.U. markets in 2005 due to concerns about a possible increased risk of heart attack and stroke.	hERG	1	0.105	0.321
36	Pergolide	[H][C@@]12CC3=CNC4=CC=CC(=C34)[C@@]1([H])C[C@@H](CSC)CN2CCC	Pergolide is a long-acting dopamine agonist approved in 1982 for the treatment of Parkinson鈥檚 Disease. It is an ergot derivative that acts on the dopamine D2 and D3, alpha2- and alpha1-adrenergic, and 5-hydroxytryptamine (5-HT) receptors. It was indicated as adjunct therapy with levodopa/carbidopa in the symptomatic treatment of parkinsonian syndrome. It was later found that pergolide increased t…	hERG	1	0.107	0.329
46	Bithionol	OC1=C(SC2=C(O)C(Cl)=CC(Cl)=C2)C=C(Cl)C=C1Cl	Bithionol, formerly marketed as an active ingredient in various topical drug products, was shown to be a potent photosensitizer with the potential to cause serious skin disorders. Approvals of the NDA's for bithionol drug products were withdrawn on October 24, 1967 (see the Federal Register of October 31, 1967 (32 FR 15046)).	Skin Sensitization	0	0.071	0.333
42	Tegaserod	CCCCCNC(=N)N\N=C\C1=CNC2=C1C=C(OC)C=C2	Novartis' brand name Zelnorm (tegaserod) had originally received approval from the US FDA in 2002 for the treatment of irritable bowel syndrome with constipation (IBS-C).[L5918,F4229] It was, however, voluntarily withdrawn from widespread use in the US market in 2007 after concerns arose over the possibility that tegaserod could potentially cause dangerous cardiovascular events in patients.[L5918…	hERG	1	0.101	0.344
12	Nimesulide	CS(=O)(=O)NC1=C(OC2=CC=CC=C2)C=C(C=C1)[N+]([O-])=O	Nimesulide is a relatively COX-2 selective, non-steroidal anti-inflammatory drug (NSAID) with analgesic and antipyretic properties. Its approved indications are the treatment of acute pain, the symptomatic treatment of osteoarthritis and primary dysmenorrhoea in adolescents and adults above 12 years old. Due to concerns about the risk of hepatotoxicity, nimesulide has been withdrawn from market i…	Hepatotoxicity	1	0.101	0.35
32	Hexylcaine	CC(CNC1CCCCC1)OC(=O)C1=CC=CC=C1	Hexylcaine hydrochloride is also known as cyclaine and osmocaine. It is a short acting local anesthetic that acts through inhibition of sodium channels. Patients experience an overdose may present with headache, tinnitus, numbness and tingling around the mouth and tongue, convulsions, inability to breathe, and decreased heart function. Hexylcaine has been discontinued in the US market.	hERG	1	0.156	0.351
17	Tolcapone	CC1=CC=C(C=C1)C(=O)C1=CC(=C(O)C(O)=C1)[N+]([O-])=O	Tolcapone is a drug that inhibits the enzyme catechol-O-methyl transferase (COMT). It is used in the treatment of Parkinson's disease as an adjunct to levodopa/carbidopa medication. It is a yellow, odorless, non-hygroscopic, crystalline compound. Tolcapone is associated with a risk of hepatotoxicity.	Hepatotoxicity	1	0.101	0.395
28	Encainide	COC1=CC=C(C=C1)C(=O)NC1=CC=CC=C1CCC1CCCCN1C	All drug products containing encainide hydrochloride. Encainide hydrochloride, formerly marketed as Enkaid capsules, was associated with increased death rates in patients who had asymptomatic heart rhythm abnormalities after a recent heart attack. The manufacturer of Enkaid capsules voluntarily withdrew the product from the US market on December 16, 1991.	hERG	1	0.163	0.397
9	Iproclozide	CC(C)NNC(=O)COC1=CC=C(Cl)C=C1	Iproclozide is an irreversible and selective hydrazine class based monoamine oxidase inhibitor (MAOI). Although it was employed as an antidepressant for a time, the fact that the agent is capable of causing fulminant hepatitis and that its use has been documented as the cause for at least three reported fatalities has resulted ultimately in the agent being discontinued.	Hepatotoxicity	0	0.135	0.4
6	Bendazac	OC(=O)COC1=NN(CC2=CC=CC=C2)C2=CC=CC=C12	Bendazac is an oxyacetic acid [A39863, A39869]. Despite possessing anti-inflammatory, anti-necrotic, choleretic, and anti-lipidemic characteristics, most research has revolved around studying and demonstrating the agent's principal action in inhibiting the denaturation of proteins - an effect that has primarily proven useful in managing and delaying the progression of ocular cataracts [A39863. A3…	Hepatotoxicity	1	0.123	0.407
3	Indoprofen	CC(C(O)=O)C1=CC=C(C=C1)N1CC2=CC=CC=C2C1=O	A drug that has analgesic and anti-inflammatory properties. Following reports of adverse reactions including reports of carcinogenicity in animal studies it was withdrawn from the market worldwide.	Carcinogenicity	0	0.108	0.436
2	Diethylstilbestrol	CC\C(=C(\CC)C1=CC=C(O)C=C1)C1=CC=C(O)C=C1	A synthetic nonsteroidal estrogen used in the treatment of menopausal and postmenopausal disorders. It was also used formerly as a growth promoter in animals. According to the Fourth Annual Report on Carcinogens (NTP 85-002, 1985), diethylstilbestrol has been listed as a known carcinogen. (Merck, 11th ed)The FDA withdrew its approval for the use of all oral and parenteral drug products containing…	Carcinogenicity	0	0.095	0.444
10	Mebanazine	CC(NN)C1=CC=CC=C1	Mebanazine, also known as _Actomol_, is a monoamine oxidase inhibitor (MAOI) belonging to the _hydrazine_ class of chemicals. It was used in the past as an antidepressant in the 1960s, but has since been discontinued because of its hepatotoxic potential.	Hepatotoxicity	0	0.107	0.444
4	Dantron	OC1=CC=CC2=C1C(=O)C1=C(C=CC=C1O)C2=O	Withdrawn from the Canadian, US, and UK markets in 1998 due to genotoxicity.	Genotoxicity	1	0.079	0.476
14	Phenoxypropazine	[H]N([H])N([H])C(C)COC1=CC=CC=C1	Phenoxypropazine is a non-selective and irreversible monoamine oxidase enzyme inhibitor (MAOI), belonging to the _hydrazine_ chemical class. It was marketed as an antidepressant in 1961 but was later withdrawn in 1966 because of its hepatotoxic potential.	Hepatotoxicity	0	0.12	0.488
16	Tienilic acid	OC(=O)COC1=C(Cl)C(Cl)=C(C=C1)C(=O)C1=CC=CS1	Tienilic acid, or ticrynafen, is a diuretic drug with uric acid-lowering action which was marketed for the treatment of hypertension. It was withdrawn in 1982 after case reports in the United States suggested a link between ticrynafen and hepatitis. (Manier et al., 1982)	Hepatotoxicity	1	0.109	0.51
37	Prenylamine	CC(CC1=CC=CC=C1)NCCC(C1=CC=CC=C1)C1=CC=CC=C1	Prenylamine was withdrawn from the Canadian, US, and UK markets in 1988 due to concerns regarding cardiac arrhythmias.	hERG	1	0.103	0.514
31	Grepafloxacin	CC1CN(CCN1)C1=C(F)C(C)=C2C(=O)C(=CN(C3CC3)C2=C1)C(O)=O	Grepafloxacin is an oral broad-spectrum quinoline antibacterial agent used to treat bacterial infections. Due to the QTc-prolonging potential, as indicated by the changes in the QT interval on the electrocardiogram, and the risk for cardiovascular adverse events, grepafloxacin was withdrawn in the United States.	hERG	1	0.127	0.529
29	Fenfluramine	CCNC(C)CC1=CC=CC(=C1)C(F)(F)F	Dravet syndrome is a pediatric encephalopathy that typically manifests within the first year of life following exposure to elevated temperatures. It is characterized by recurrent pharmacoresistant seizures, which increase in frequency and severity with disease progression. Concomitantly with these seizures, patients typically display delayed development and neurocognitive impairment.[A214694, A21…	hERG	1	0.111	0.55
11	Nefazodone	CCC1=NN(CCCN2CCN(CC2)C2=CC(Cl)=CC=C2)C(=O)N1CCOC1=CC=CC=C1	Nefazodone hydrochloride (trade name Serzone) is an antidepressant drug marketed by Bristol-Myers Squibb. Its sale was discontinued in 2003 in some countries, due to the small possibility of hepatic (liver) injury. Drug-induced hepatic injuries were associated with an risk of elevated need for a liver transplant, or even death, with the incidence of severe liver damage was shown to be approximate…	Hepatotoxicity	1	0.117	0.552
19	Troglitazone	CC1=C(C)C2=C(CCC(C)(COC3=CC=C(CC4SC(=O)NC4=O)C=C3)O2)C(C)=C1O	Troglitazone was withdrawn in 2000 due to risk of hepatotoxicity. It was superseded by [pioglitazone] and [rosiglitazone].	Hepatotoxicity	1	0.111	0.565
38	Rofecoxib	CS(=O)(=O)C1=CC=C(C=C1)C1=C(C(=O)OC1)C1=CC=CC=C1	Rofecoxib is used for the treatment of osteoarthritis, rheumatoid arthritis, acute pain in adults, and primary dysmenorrhea, as well as acute treatment of migraine attacks with or without auras. Rofecoxib is a solid. This compound belongs to the stilbenes. These are organic compounds containing a 1,2-diphenylethylene moiety. Stilbenes (C6-C2-C6 ) are derived from the common phenylpropene (C6-C3) …	hERG	0	0.106	0.595
40	Sibutramine	CC(C)CC(N(C)C)C1(CCC1)C1=CC=C(Cl)C=C1	Sibutramine (trade name Meridia in the USA, Reductil in Europe and other countries), usually as sibutramide hydrochloride monohydrate, is an orally administered agent for the treatment of obesity. It is a centrally acting stimulant chemically related to amphetamines thus it is classified as a Schedule IV controlled substance in the United States. In October 2010, Sibutramine was withdrawn from Ca…	hERG	1	0.103	0.6
23	Bepridil	CC(C)COCC(CN(CC1=CC=CC=C1)C1=CC=CC=C1)N1CCCC1	A long-acting, non selective, calcium channel blocker with significant anti-anginal activity. The drug produces significant coronary vasodilation and modest peripheral effects. It has antihypertensive and selective anti-arrhythmia activities and acts as a calmodulin antagonist. It is no longer marketed in the United States, as it has been implicated in causing ventricular arrhythmias (ie. Torsade…	hERG	1	0.116	0.62
7	Bromfenac	NC1=C(CC(O)=O)C=CC=C1C(=O)C1=CC=C(Br)C=C1	Bromfenac is a nonsteroidal anti-inflammatory drug (NSAID) for ophthalmic use. Ophthalmic NSAIDs are becoming a cornerstone for the management of ocular pain and inflammation. Their well-characterized anti-inflammatory activity, analgesic property, and established safety record have also made NSAIDs an important tool for optimizing surgical outcomes. Non-ophthalmic formulations of bromfenac were …	Hepatotoxicity	1	0.113	0.632
13	Pheniprazine	CC(CC1=CC=CC=C1)NN	Pheniprazine is an irreversible and nonselective monoamine oxidase inhibitor (MAOI) of the hydrazine chemical class that was used as an antidepressant in the 1960s. In addition, it was used for the treatment of other conditions, such as angina pectoris and schizophrenia. Pheniprazine was withdrawn by its manufacturer due to its ability to cause toxicity in the liver and its ability to cause optic…	Hepatotoxicity	0	0.117	0.654
33	Levacetylmethadol	CC[C@H](OC(C)=O)C(C[C@H](C)N(C)C)(C1=CC=CC=C1)C1=CC=CC=C1	Levacetylmethadol is a narcotic analgesic with a long onset and duration of action. It is used mainly in the treatment of narcotic dependence. Levacetylmethadol was withdrawn from use in the European Union due to its high risk of QT interval prolongation. The production of levacetylmethadol in the US has ceased as well.[L44052,T862]	hERG	1	0.116	0.705
44	Thioridazine	CSC1=CC2=C(SC3=CC=CC=C3N2CCC2CCCCN2C)C=C1	A phenothiazine antipsychotic used in the management of psychoses, including schizophrenia, and in the control of severely disturbed or agitated behavior. It has little antiemetic activity. Thioridazine has a higher incidence of antimuscarinic effects, but a lower incidence of extrapyramidal symptoms, than chlorpromazine. (From Martindale, The Extra Pharmacopoeia, 30th ed, p618).Thioridazine was …	hERG	1	0.128	0.709
21	Ximelagatran	CCOC(=O)CN[C@@H](C(=O)N1CC[C@H]1C(=O)NCC1=CC=C(C=C1)C(\N)=N\O)C1CCCCC1	Ximelagatran is an anticoagulant intended to become a replacement for warfarin by overcoming the dietary restrictions, drug interaction, and monitoring issues associated with the former. In 2006, its manufacturer AstraZeneca announced that it would not attempt to market ximelagatran after reports of hepatotoxicity (liver damage) during trials, and to discontinue its distribution in countries wher…	Hepatotoxicity	1	0.116	0.783
22	Astemizole	COC1=CC=C(CCN2CCC(CC2)NC2=NC3=CC=CC=C3N2CC2=CC=C(F)C=C2)C=C1	Astemizole is a long-acting, non-sedating second generation antihistamine used in the treatment of allergy symptoms. It was withdrawn from market by the manufacturer in 1999 due to the potential to cause arrhythmias at high doses, especially when when taken with CYP inhibitors or grapefruit juice.	hERG	1	0.164	0.814
39	Sertindole	FC1=CC=C(C=C1)N1C=C(C2CCN(CCN3CCNC3=O)CC2)C2=C1C=CC(Cl)=C2	Sertindole, a neuroleptic, is one of the newer antipsychotic medications available. Serdolect is developed by the Danish pharmaceutical company H. Lundbeck. It is a phenylindole derivative used in the treatment of schizophrenia. It was first marketed in 1996 in several European countries before being withdrawn two years later because of numerous cardiac adverse effects. It has once again been app…	hERG	1	0.141	0.845
43	Terfenadine	CC(C)(C)C1=CC=C(C=C1)C(O)CCCN1CCC(CC1)C(O)(C1=CC=CC=C1)C1=CC=CC=C1	In the U.S., Terfenadine was superseded by fexofenadine in the 1990s due to the risk of cardiac arrhythmia caused by QT interval prolongation.	hERG	1	0.145	0.911
26	Clobutinol	CC(CN(C)C)C(C)(O)CC1=CC=C(Cl)C=C1	Clobutinol is a cough suppressant that is withdrawn from the US and EU markets. Clobutinol may prolong the QT interval. In 2007, Clobutinol was determined to cause cardiac arrhythmia in some patients.	hERG	1	0.099	1
20	Trovafloxacin	[H][C@@]12CN(C[C@]1([H])[C@H]2N)C1=NC2=C(C=C1F)C(=O)C(=CN2C1=C(F)C=C(F)C=C1)C(O)=O	Trovafloxacin is a broad spectrum antibiotic that has been commonly marketed under the brand name Trovan by Pfizer. It exerts its antibacterial activity by inhibiting the uncoiling of supercoiled DNA in various bacteria by blocking the activity of DNA gyrase and topoisomerase IV. It was shown to be more effective against Gram-positive bacteria than Gram-negative bacteria when compared to previous…	Hepatotoxicity	1	0.109	1
27	Dextropropoxyphene	CCC(=O)O[C@@](CC1=CC=CC=C1)([C@H](C)CN(C)C)C1=CC=CC=C1	Dextropropoxyphene is an opioid analgesic manufactured by Eli Lilly and Company. It is used in the symptomatic treatment of mild pain. It displays antitussive and local anaesthetic actions. Due to the risk of cardiac arrhythmias and overdose, possibly leading to death, dextropropoxyphene has been withdrawn from the market in Europe and the United States. The drug is often referred to as the gener…	hERG	1	0.118	1
35	Ondansetron	CN1C2=C(C3=CC=CC=C13)C(=O)C(CN1C=CN=C1C)CC2	A competitive serotonin type 3 receptor antagonist. It is effective in the treatment of nausea and vomiting caused by cytotoxic chemotherapy drugs, including cisplatin, and has reported anxiolytic and neuroleptic properties.Having been developed in the 1980s by GlaxoSmithKline and approved by the US FDA since January 1991, ondansetron has demonstrated a long history of use and efficacy. Commonly …	hERG	1	0.137	1
25	Cisapride	CO[C@H]1CN(CCCOC2=CC=C(F)C=C2)CC[C@H]1NC(=O)C1=CC(Cl)=C(N)C=C1OC	In many countries (including Canada) cisapride has been either withdrawn or has had its indications limited due to reports about long QT syndrome due to cisapride, which predisposes to arrhythmias. The FDA issued a warning letter regarding this risk to health care professionals and patients.	hERG	1	0.164	1

## Sheet: caco-2
SI caco-2
1	drug_name	smi	caco-2	pred	mean similarity	max similarity
72	Uracil	O=C1NC=CC(=O)N1	-5.37	-4.893	0.08	0.2
68	Aminophenazone	CN(C)C1=C(C)N(C)N(C1=O)C1=CC=CC=C1	-4.44	-4.436	0.109	0.246
11	Lidocaine	CCN(CC)CC(=O)NC1=C(C)C=CC=C1C	-4.21	-4.477	0.123	0.25
69	Antipyrine	CN1N(C(=O)C=C1C)C1=CC=CC=C1	-4.55	-4.329	0.12	0.264
15	Sulpiride	CCN1CCCC1CNC(=O)C1=C(OC)C=CC(=C1)S(N)(=O)=O	-6.16	-5.174	0.143	0.271
7	Nevirapine	CC1=C2NC(=O)C3=C(N=CC=C3)N(C3CC3)C2=NC=C1	-4.52	-4.603	0.122	0.278
34	Furosemide	NS(=O)(=O)C1=C(Cl)C=C(NCC2=CC=CO2)C(=C1)C(O)=O	-6.5	-6.043	0.12	0.288
73	Phencyclidine	C1CCN(CC1)C1(CCCCC1)C1=CC=CC=C1	-4.61	-4.317	0.091	0.294
24	Bosentan	COC1=CC=CC=C1OC1=C(NS(=O)(=O)C2=CC=C(C=C2)C(C)(C)C)N=C(N=C1OCCO)C1=NC=CC=N1	-5.98	-5.389	0.121	0.309
33	Warfarin	CC(=O)CC(C1=CC=CC=C1)C1=C(O)C2=C(OC1=O)C=CC=C2	-4.68	-4.679	0.134	0.312
32	Pirenzepine	CN1CCN(CC(=O)N2C3=CC=CC=C3C(=O)NC3=C2N=CC=C3)CC1	-6.36	-4.981	0.136	0.324
27	Clonidine	ClC1=CC=CC(Cl)=C1NC1=NCCN1	-4.59	-4.635	0.083	0.326
59	Desipramine	CNCCCN1C2=CC=CC=C2CCC2=CC=CC=C12	-4.67	-4.518	0.117	0.349
45	Terbutaline	CC(C)(C)NCC(O)C1=CC(O)=CC(O)=C1	-6.38	-5.096	0.096	0.368
12	Indomethacin	COC1=CC2=C(C=C1)N(C(=O)C1=CC=C(Cl)C=C1)C(C)=C2CC(O)=O	-4.69	-4.736	0.125	0.373
23	Piroxicam	CN1C(C(=O)NC2=NC=CC=C2)=C(O)C2=C(C=CC=C2)S1(=O)=O	-4.45	-5.247	0.12	0.383
49	Pindolol	CC(C)NCC(O)COC1=CC=CC2=C1C=CN2	-4.78	-5.008	0.111	0.415
74	Urea	NC(N)=O	-5.34	-5.568	0.056	0.417
51	Dopamine	NCCC1=CC(O)=C(O)C=C1	-5.03	-4.871	0.096	0.429
56	Ibuprofen	CC(C)CC1=CC=C(C=C1)C(C)C(O)=O	-4.28	-4.572	0.133	0.488
48	Salicylic acid	OC(=O)C1=CC=CC=C1O	-4.79	-4.65	0.118	0.5
43	Diazepam	CN1C2=C(C=C(Cl)C=C2)C(=NCC1=O)C1=CC=CC=C1	-4.32	-4.492	0.125	0.526
10	Theophylline	CN1C2=C(NC=N2)C(=O)N(C)C1=O	-4.35	-4.486	0.089	0.529
5	Caffeine	CN1C=NC2=C1C(=O)N(C)C(=O)N2C	-4.41	-4.456	0.09	0.538
46	Chlorothiazide	NS(=O)(=O)C1=C(Cl)C=C2NC=NS(=O)(=O)C2=C1	-6.72	-6.254	0.078	0.545
53	Hydrochlorothiazide	NS(=O)(=O)C1=C(Cl)C=C2NCNS(=O)(=O)C2=C1	-6.06	-6.269	0.082	0.545
65	Olsalazine	OC(=O)C1=CC(=CC=C1O)\N=N\C1=CC=C(O)C(=C1)C(O)=O	-6.96	-6.324	0.107	0.552
8	Phenytoin	O=C1NC(=O)C(N1)(C1=CC=CC=C1)C1=CC=CC=C1	-4.57	-4.694	0.096	0.556
75	Fleroxacin	CN1CCN(CC1)C1=C(F)C=C2C(=O)C(=CN(CCF)C2=C1F)C(O)=O	-4.81	-4.704	0.122	0.576
26	Propranolol	CC(C)NCC(O)COC1=CC=CC2=C1C=CC=C2	-4.58	-4.87	0.119	0.58
70	Oxprenolol	CC(C)NCC(O)COC1=CC=CC=C1OCC=C	-4.68	-4.869	0.114	0.588
13	Atenolol	CC(C)NCC(O)COC1=CC=C(CC(N)=O)C=C1	-6.44	-5.3	0.133	0.596
55	Felodipine	CCOC(=O)C1=C(C)NC(C)=C(C1C1=C(Cl)C(Cl)=CC=C1)C(=O)OC	-4.64	-4.671	0.137	0.607
18	Imipramine	CN(C)CCCN1C2=CC=CC=C2CCC2=CC=CC=C12	-4.85	-4.379	0.111	0.611
44	Alprenolol	CC(C)NCC(O)COC1=CC=CC=C1CC=C	-4.62	-4.848	0.115	0.611
22	Cimetidine	CN\C(NCCSCC1=C(C)NC=N1)=N\C#N	-5.89	-5.401	0.079	0.623
42	Meloxicam	CN1C(C(=O)NC2=NC=C(C)S2)=C(O)C2=C(C=CC=C2)S1(=O)=O	-4.71	-5.162	0.118	0.623
9	Metoprolol	COCCC1=CC=C(OCC(O)CNC(C)C)C=C1	-4.59	-4.889	0.111	0.681
39	Acyclovir	NC1=NC(=O)C2=C(N1)N(COCCO)C=N2	-6.15	-5.999	0.101	0.689
60	Acebutolol	CCCC(=O)NC1=CC=C(OCC(O)CNC(C)C)C(=C1)C(C)=O	-5.83	-5.089	0.121	0.689
41	Sulfasalazine	OC(=O)C1=CC(=CC=C1O)\N=N\C1=CC=C(C=C1)S(=O)(=O)NC1=NC=CC=C1	-6.33	-6.306	0.116	0.691
54	Ganciclovir	NC1=NC2=C(N=CN2COC(CO)CO)C(=O)N1	-6.27	-6.149	0.102	0.696
57	Nitrendipine	CCOC(=O)C1=C(C)NC(C)=C(C1C1=CC(=CC=C1)[N+]([O-])=O)C(=O)OC	-4.77	-4.777	0.136	0.7
50	Telmisartan	CCCC1=NC2=C(C=C(C=C2C)C2=NC3=CC=CC=C3N2C)N1CC1=CC=C(C=C1)C1=CC=CC=C1C(O)=O	-4.82	-5.039	0.125	0.768
66	Practolol	CC(C)NCC(O)COC1=CC=C(NC(C)=O)C=C1	-6.05	-5.139	0.127	0.78
20	Chlorpromazine	CN(C)CCCN1C2=CC=CC=C2SC2=C1C=C(Cl)C=C2	-4.7	-4.372	0.11	0.784
36	Mannitol	OC[C@@H](O)[C@@H](O)[C@H](O)[C@H](O)CO	-6.21	-6.401	0.045	1
30	Guanabenz	NC(N)=NN=CC1=C(Cl)C=CC=C1Cl	-4.5	-4.632	0.082	1
71	Sucrose	OC[C@H]1O[C@@](CO)(O[C@H]2O[C@H](CO)[C@@H](O)[C@H](O)[C@H]2O)[C@@H](O)[C@@H]1O	-5.77	-6.347	0.082	1
16	Griseofulvin	COC1=CC(OC)=C(Cl)C2=C1C(=O)[C@]1(O2)[C@H](C)CC(=O)C=C1OC	-4.44	-4.579	0.098	1
17	Chloramphenicol	OC[C@@H](NC(=O)C(Cl)Cl)[C@H](O)C1=CC=C(C=C1)[N+]([O-])=O	-4.69	-5.335	0.102	1
29	Testosterone	[H][C@@]12CC[C@H](O)[C@@]1(C)CC[C@@]1([H])[C@@]2([H])CCC2=CC(=O)CC[C@]12C	-4.34	-4.759	0.103	1
2	Cyclosporine	CC[C@@H]1NC(=O)[C@H]([C@H](O)[C@H](C)C\C=C\C)N(C)C(=O)[C@H](C(C)C)N(C)C(=O)[C@H](CC(C)C)N(C)C(=O)[C@H](CC(C)C)N(C)C(=O)[C@@H](C)NC(=O)[C@H](C)NC(=O)[C@H](CC(C)C)N(C)C(=O)[C@@H](NC(=O)[C@H](CC(C)C)N(C)C(=O)CN(C)C1=O)C(C)C	-6.05	-5.544	0.106	1
38	Estradiol	[H][C@@]12CC[C@H](O)[C@@]1(C)CC[C@]1([H])C3=C(CC[C@@]21[H])C=C(O)C=C3	-4.77	-4.827	0.106	1
31	Epinephrine	CNC[C@H](O)C1=CC(O)=C(O)C=C1	-6.02	-4.937	0.108	1
64	Dexamethasone	[H][C@@]12C[C@@H](C)[C@](O)(C(=O)CO)[C@@]1(C)C[C@H](O)[C@@]1(F)[C@@]2([H])CCC2=CC(=O)C=C[C@]12C	-4.75	-5.029	0.112	1
3	Nicotine	CN1CCC[C@H]1C1=CN=CC=C1	-4.71	-4.394	0.113	1
21	Zidovudine	CC1=CN([C@H]2C[C@H](N=[N+]=[N-])[C@@H](CO)O2)C(=O)NC1=O	-5.16	-5.599	0.114	1
47	Quinidine	[H][C@@]12CCN(C[C@@H]1C=C)[C@]([H])(C2)[C@@H](O)C1=C2C=C(OC)C=CC2=NC=C1	-4.69	-4.835	0.116	1
35	Hydrocortisone	[H][C@@]12CC[C@](O)(C(=O)CO)[C@@]1(C)C[C@H](O)[C@@]1([H])[C@@]2([H])CCC2=CC(=O)CC[C@]12C	-4.66	-5.12	0.117	1
62	Ceftriaxone	[H][C@]12SCC(CSC3=NC(=O)C(=O)NN3C)=C(N1C(=O)[C@H]2NC(=O)C(=N/OC)\C1=CSC(N)=N1)C(O)=O	-6.88	-6.098	0.117	1
4	Betaxolol	CC(C)NCC(O)COC1=CC=C(CCOCC2CC2)C=C1	-4.81	-4.849	0.118	1
25	Methotrexate	CN(CC1=CN=C2N=C(N)N=C(N)C2=N1)C1=CC=C(C=C1)C(=O)N[C@@H](CCC(O)=O)C(O)=O	-5.92	-5.9	0.122	1
61	Nadolol	CC(C)(C)NCC(O)COC1=CC=CC2=C1C[C@H](O)[C@H](O)C2	-5.41	-5.153	0.123	1
67	Mibefradil	COCC(=O)O[C@]1(CCN(C)CCCC2=NC3=CC=CC=C3N2)CCC2=C(C=CC(F)=C2)[C@@H]1C(C)C	-4.87	-5.013	0.129	1
52	Doxorubicin	COC1=CC=CC2=C1C(=O)C1=C(O)C3=C(C[C@](O)(C[C@@H]3O[C@H]3C[C@H](N)[C@H](O)[C@H](C)O3)C(=O)CO)C(O)=C1C2=O	-6.8	-6.38	0.13	1
40	Naproxen	COC1=CC2=C(C=C1)C=C(C=C2)[C@H](C)C(O)=O	-4.83	-4.696	0.131	1
6	Remikiren	CC(C)(C)S(=O)(=O)C[C@@H](CC1=CC=CC=C1)C(=O)N[C@@H](CC1=CN=CN1)C(=O)N[C@@H](CC1CCCCC1)[C@@H](O)[C@@H](O)C1CC1	-6.13	-5.928	0.132	1
63	Saquinavir	[H][C@@]12CCCC[C@]1([H])CN(C[C@@H](O)[C@H](CC1=CC=CC=C1)NC(=O)[C@H](CC(N)=O)NC(=O)C1=NC3=C(C=CC=C3)C=C1)[C@@H](C2)C(=O)NC(C)(C)C	-6.26	-6.276	0.132	1
58	Amoxicillin	[H][C@]12SC(C)(C)[C@@H](N1C(=O)[C@H]2NC(=O)[C@H](N)C1=CC=C(O)C=C1)C(O)=O	-6.1	-6.048	0.133	1
14	Diltiazem	COC1=CC=C(C=C1)[C@@H]1SC2=C(C=CC=C2)N(CCN(C)C)C(=O)[C@@H]1OC(C)=O	-4.38	-4.656	0.134	1
19	Methscopolamine bromide	[Br-].[H][C@@]12O[C@]1([H])[C@H]1C[C@H](C[C@@H]2[N+]1(C)C)OC(=O)[C@H](CO)C1=CC=CC=C1	-6.16	-5.02	0.143	1
37	Scopolamine	CN1[C@H]2C[C@@H](C[C@@H]1[C@H]1O[C@@H]21)OC(=O)[C@H](CO)C1=CC=CC=C1	-4.93	-4.866	0.158	1
28	Enalapril	CCOC(=O)[C@H](CCC1=CC=CC=C1)N[C@@H](C)C(=O)N1CCC[C@H]1C(O)=O	-5.64	-5.283	0.16	1
